# Supplementary material for: Unraveling emission narrowing pathways in N-embedded polyaromatic systems via sequential π-interlocking for efficient electroluminescence
Source: Royal Society of Chemistry journal article supplement (doi:10.1039/d6sc02898e), 2026-06-01
Supplement: d6sc02898e1.pdf [file d6sc02898e1.pdf]

# **Unraveling Emission Narrowing Pathways in *N*-Embedded Polyaromatic Systems *via* Sequential $\pi$ -Interlocking for Efficient Electroluminescence**

*Danish Khan,<sup>a</sup> Seungwon Han,<sup>b</sup> Keerthika P,<sup>a</sup> Pankaj Kumar Gupta,<sup>a</sup> Ankit Kumar,<sup>a</sup> Jun Yeob  
Lee,<sup>b\*</sup> Rajendra Kumar Konidena<sup>\*a</sup>*

*<sup>a</sup>Organic Materials Laboratory (OM-Lab), Department of Chemistry, Indian Institute of  
Technology-Patna, Bihta Kanpa Rd, Patna, Dayalpur, Daultapur, Bihar 801106, India*

*<sup>b</sup>School of Chemical Engineering, Sungkyunkwan University 2066, Seobu-ro, Jangan-gu,  
Suwon, Gyeonggi, 16419, Korea*

E-mail: [leej17@skku.edu](mailto:leej17@skku.edu) and [rajsan@iitp.ac.in](mailto:rajsan@iitp.ac.in)

## Supplementary Information

### Table of contents

|                   |                                                                                                                                                          |       |
|-------------------|----------------------------------------------------------------------------------------------------------------------------------------------------------|-------|
|                   | Experimental section                                                                                                                                     | S3-S5 |
| <b>Scheme S1</b>  | Synthetic pathway for <b>CzTPA</b> , <b>CzCz</b> , <b>CzICz</b> and <b>ICzICz</b>                                                                        | S6    |
| <b>Figure S1</b>  | TGA plot of the compounds <b>CzTPA</b> , <b>CzCz</b> , <b>CzICz</b> and <b>ICzICz</b>                                                                    | S6    |
| <b>Figure S2</b>  | Optimized structure with dihedral angle and reorganisation energy of <b>CzTPA</b> , <b>CzCz</b> , <b>CzICz</b> and <b>ICzICz</b> computed by DFT methods | S7    |
| <b>Figure S3</b>  | Solvatochromic analysis of compounds <b>CzTPA</b> , <b>CzCz</b> , <b>CzICz</b> and <b>ICzICz</b>                                                         | S7    |
| <b>Figure S4</b>  | Lippert-Mataga plot of <b>CzTPA</b> , <b>CzCz</b> , <b>CzICz</b> and <b>ICzICz</b>                                                                       | S8    |
| <b>Figure S5</b>  | Phosphorescence spectra of <b>CzTPA</b> , <b>CzCz</b> , <b>CzICz</b> and <b>ICzICz</b> measured in frozen THF                                            | S8    |
| <b>Figure S6</b>  | Time-resolved PL spectra of compounds collected in dilute DCM.                                                                                           | S9    |
| <b>Figure S7</b>  | Cyclic voltammogram of <b>CzTPA</b> , <b>CzCz</b> , <b>CzICz</b> and <b>ICzICz</b>                                                                       | S10   |
| <b>Figure S8</b>  | Fluorescent OLED device structure for <b>CzCz</b> , <b>CzICz</b> and <b>ICzICz</b>                                                                       | S11   |
| <b>Figure S9</b>  | Phosphorescent OLED device structure for <b>CzCz</b> , <b>CzICz</b> and <b>ICzICz</b>                                                                    | S11   |
| <b>Figure S10</b> | a) Hole only (HOD) and b) electron only (EOD) device studies of <b>CzICz</b> and <b>CzCz</b> .                                                           | S12   |
| <b>Figure S11</b> | <sup>1</sup> H NMR spectra of compound <b>CzTPA</b> recorded in CDCl <sub>3</sub>                                                                        | S12   |
| <b>Figure S12</b> | <sup>13</sup> C NMR spectra of compound <b>CzTPA</b> recorded in CDCl <sub>3</sub>                                                                       | S13   |
| <b>Figure S13</b> | <sup>1</sup> H NMR spectra of compound <b>CzCz</b> recorded in CDCl <sub>3</sub>                                                                         | S13   |
| <b>Figure S14</b> | <sup>13</sup> C NMR spectra of compound <b>CzCz</b> recorded in CDCl <sub>3</sub>                                                                        | S14   |
| <b>Figure S15</b> | <sup>1</sup> H NMR spectra of compound <b>CzICz</b> recorded in CDCl <sub>3</sub>                                                                        | S14   |

|                   |                                                                                   |     |
|-------------------|-----------------------------------------------------------------------------------|-----|
| <b>Figure S16</b> | $^{13}\text{C}$ NMR spectra of compound <b>CzICz</b> recorded in $\text{CDCl}_3$  | S15 |
| <b>Figure S17</b> | $^1\text{H}$ NMR spectra of compound <b>ICzICz</b> recorded in $\text{CDCl}_3$    | S15 |
| <b>Figure S18</b> | $^{13}\text{C}$ NMR spectra of compound <b>ICzICz</b> recorded in $\text{CDCl}_3$ | S16 |
| <b>Table S1</b>   | Comparison of CIEy and EQE of <b>ICzICz</b> with the reported UV emitters.        | S16 |
| <b>Table S2</b>   | Cartesian coordinates of the compound <b>CzTPA</b>                                | S19 |
| <b>Table S3</b>   | Cartesian coordinates of the compound <b>CzCz</b>                                 | S23 |
| <b>Table S4</b>   | Cartesian coordinates of the compound <b>CzICz</b>                                | S28 |
| <b>Table S5</b>   | Cartesian coordinates of the compound <b>ICzICz</b>                               | S32 |
|                   | References                                                                        | S36 |

## Experimental Details

### General methods

All solvents and reagents were used as received from commercial suppliers without further purification. The intermediates were synthesized following previously reported procedures.<sup>[1]</sup> All reactions were conducted under an inert atmosphere. The structure of the target compound was confirmed by nuclear magnetic resonance spectroscopy ( $^1\text{H}$  and  $^{13}\text{C}$  NMR). The photophysical properties of the target compound were investigated using UV-visible absorption and fluorescence spectroscopy with freshly prepared solutions. Thermal stability was evaluated via thermogravimetric analysis (TGA) under an inert atmosphere at a heating rate of  $10\text{ }^\circ\text{C}/\text{min}$ . Electrochemical properties were examined using a standard three electrode setup consisting of a silver reference electrode, a carbon working electrode, and a platinum counter electrode; ferrocene used as an internal standard. For theoretical insights, density functional theory (DFT) calculations were performed using the B3LYP functional and

the 6-31G(d,p) basis set. Fluorescence lifetime decay measurements were recorded in a 1 cm quartz cell on a Horiba Jobin Yvon “FluoroCube Fluorescence Lifetime System” equipped with NanoLEDs and LDs as the excitation source(s) and an automated polarization accessory (Model 5000 U-02). The hole only (HOD) and electron only (EOD) devices were fabricated using the configuration: for HOD device: PEDOT(40 nm)/TAPC(10 nm)/CzCz or CzICz (30 nm)/TAPC(20 nm)/Al(200 nm) and for EOD device: PEDOT(40 nm)/TSPO1(20 nm)/CzCz or CzICz (30 nm)/TSPO1(10 nm)/LiF(1.5 nm)/Al(200 nm)

## Synthesis

**Synthesis of (4'-(3,6-di-*tert*-butyl-9*H*-carbazol-9-yl)-*N,N*-diphenyl-[1,1'-biphenyl]-4-amine) CzTPA:** In a 250 mL two neck round-bottomed flask, the mixture of 9-(4-bromophenyl)-3,6-di-*tert*-butyl-9*H*-carbazole **1** (0.3 g, 0.69 mmol), (4-(diphenylamino)phenyl)boronic acid (0.22 g, 0.76 mmol) and potassium carbonate (0.477 g, 3.45 mmol) were dissolved in tetrahydrofuran (20 mL) and water (5 mL) in inert atmosphere, the Pd(PPh<sub>3</sub>)<sub>4</sub> (40 mg, 0.034 mmol) was added to it. The resulting mixture was refluxed at 80 °C for 12 h under a nitrogen atmosphere. The mixture was cooled and the solvent was evaporated to dryness. The residue was subjected to column chromatography on silica (cyclohexane: dichloromethane (9:1)) to give the desired product **CzTPA** as a white solid with 70% yield (0.28 g). <sup>1</sup>H NMR (400.25 MHz, CDCl<sub>3</sub>, δ ppm): 8.00-7.98 (m, 2H), 7.77-7.73 (m, 2H), 7.61-7.55 (m, 8H), 6.92-6.89 (m, 3H), 6.88-6.66 (m, 3H), 1.32 (s, 18H); <sup>13</sup>C{<sup>1</sup>H} NMR (400 MHz, CDCl<sub>3</sub>, δ ppm): 147.74, 147.65, 147.47, 142.85, 139.25, 136.88, 134.11, 129.36, 129.27, 127.83, 127.75, 127.32, 126.94, 124.56, 124.32, 124.10, 123.85, 123.62, 123.39, 123.10, 122.84, 116.25, 109.30, 34.76, 32.06.

**(3,6-di-*tert*-butyl-9-(4-(9-phenyl-9*H*-carbazol-3-yl)phenyl)-9*H*-carbazole) CzCz:** The **CzCz** was synthesized employing the same synthetic procedure as **CzTPA** using **1** (0.3 g, 0.69 mmol), (9-phenyl-9*H*-carbazol-3-yl)boronic acid (0.218 g, 0.76 mmol), potassium carbonate

(0.477 g, 3.45 mmol) and Pd(PPh<sub>3</sub>)<sub>4</sub> (40 mg, 0.034 mmol). White solid with 65% yield (0.27 g). <sup>1</sup>H NMR (400.25 MHz, CDCl<sub>3</sub>, δ ppm): 8.36 (s, 2H), 8.23-8.18 (m, 4H), 7.99-7.95 (m, 5H), 7.72 (d, *J* = 8.0 Hz, 2H), 7.66-7.59 (m, 2H), 7.53-7.50 (m, 5H), 7.49-7.39 (m, 2H), 1.49 (s, 18H); <sup>13</sup>C{<sup>1</sup>H} NMR (400 MHz, CDCl<sub>3</sub>, δ ppm): 143.81, 142.95, 142.17, 139.44, 139.35, 136.90, 130.19, 129.57, 127.14, 123.73, 123.51, 123.40, 122.03, 119.35, 118.88, 116.36, 112.47, 109.41, 34.85, 32.14.

**(2-(4-(3,6-di-*tert*-butyl-9*H*-carbazol-9-yl)phenyl)indolo[3,2,1-*jk*]carbazole) CzICz:** The CzICz was synthesized employing the same synthetic procedure as CzTPA using **1** (0.3 g, 0.69 mmol), (9-phenyl-9*H*-carbazol-3-yl)boronic acid (0.218 g, 0.76 mmol), potassium carbonate (0.477 g, 3.45 mmol) and Pd(PPh<sub>3</sub>)<sub>4</sub> (40 mg, 0.034 mmol). White solid with 70% yield (0.26 g). <sup>1</sup>H NMR (400.25 MHz, CDCl<sub>3</sub>, δ ppm): 8.46 (s, 1H), 8.24-8.18 (m, 3H), 7.94-7.91 (m, 2H), 7.67-7.63 (m, 2H), 7.52-7.50 (m, 4H), 7.50-7.45 (m, 6H), 7.36-7.32 (m, 2H), 1.49 (s, 18H); <sup>13</sup>C{<sup>1</sup>H} NMR (400 MHz, CDCl<sub>3</sub>, δ ppm): 142.91, 141.53, 140.74, 140.63, 139.43, 137.73, 136.79, 132.69, 130.06, 128.58, 127.70, 127.21, 127.12, 126.36, 125.48, 124.10, 123.70, 123.55, 123.48, 120.50, 120.28, 118.93, 116.33, 110.29, 110.10, 109.41, 34.84, 32.14.

**(2',11'-di-*tert*-butyl-2,5'-biindolo[3,2,1-*jk*]carbazole) ICzICz:** The ICzICz was synthesized employing the same synthetic procedure as CzTPA using **2** (0.3 g, 0.81 mmol), indolo[3,2,1-*jk*]carbazol-2-yl boronic acid (0.254 g, 0.89 mmol), potassium carbonate (0.337 g, 2.44 mmol) and Pd(PPh<sub>3</sub>)<sub>4</sub> (47 mg, 0.040 mmol). White solid with 77% yield (0.31 g). <sup>1</sup>H NMR (400.25 MHz, CDCl<sub>3</sub>, δ ppm): 8.55 (s, 1H), 8.43-8.41(m, 2H), 8.26-8.13 (m, 5H), 8.01-7.88 (m, 5H), 7.66-7.59 (m, 3H), 7.44-7.40 (m, 2H); <sup>13</sup>C{<sup>1</sup>H} NMR (400 MHz, CDCl<sub>3</sub>, δ ppm): 142.93, 139.34, 130.17, 127.10, 122.02, 119.34, 116.34, 112.46, 109.38, 34.84, 32.12.

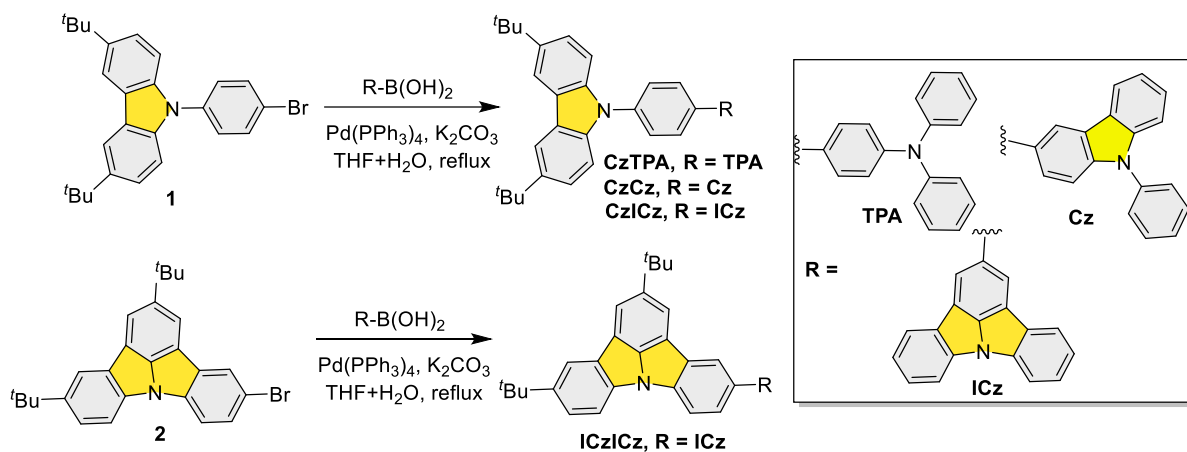

**Scheme S1.** Synthetic pathway for CzTPA, CzCz, CzICz and ICzICz

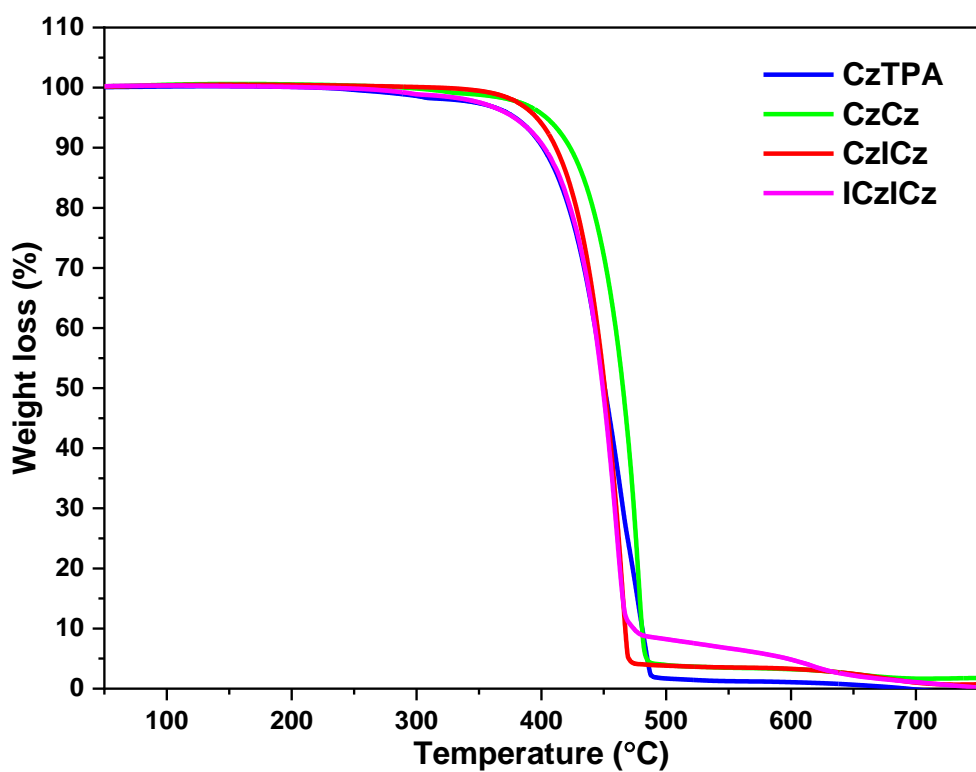

**Figure S1.** TGA plot of the compounds CzTPA, CzCz, CzICz and ICzICz

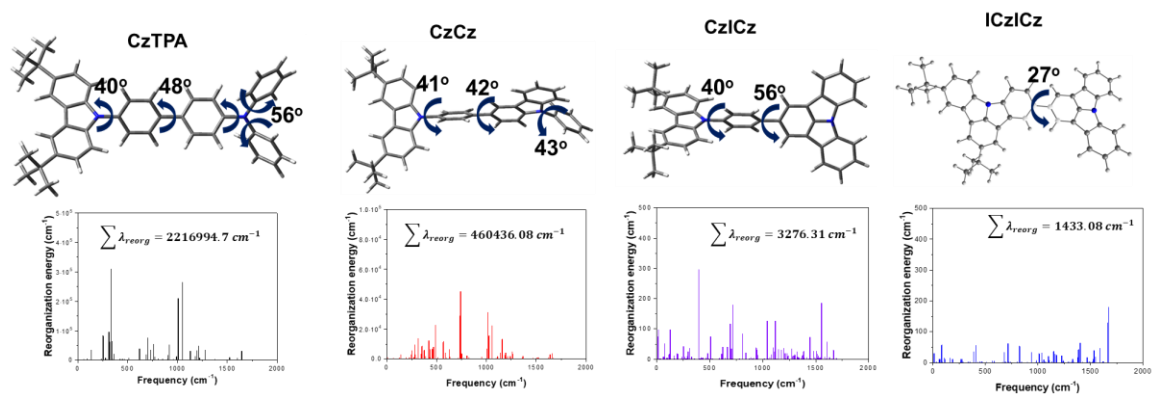

**Figure S2.** Optimized structure with dihedral angle and reorganisation energy of CzTPA, CzCz, CzICz and ICzICz computed by DFT methods

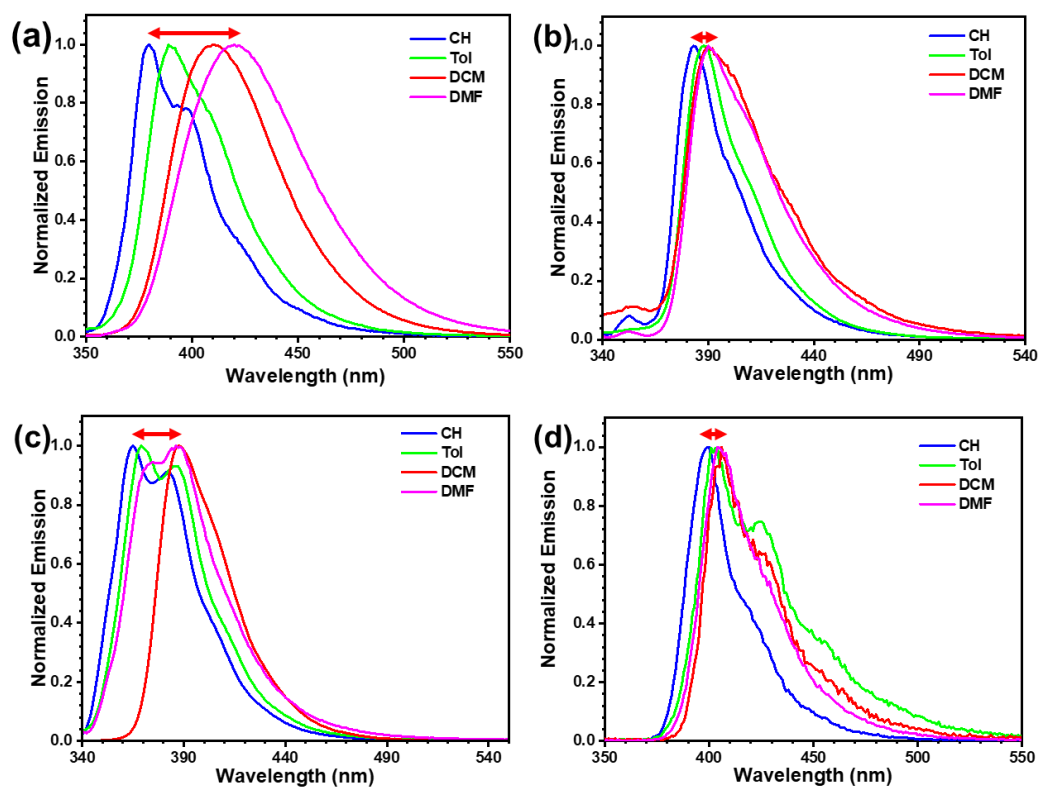

**Figure S3.** Solvatochromic analysis of compounds CzTPA, CzCz, CzICz and ICzICz

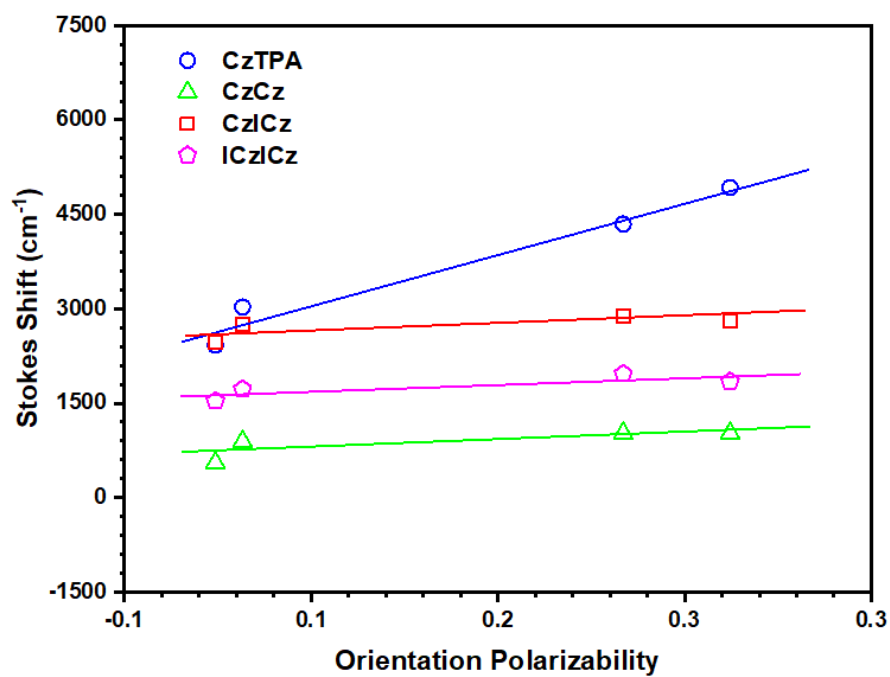

Figure S4. Lippert-Mataga plot of CzTPA, CzCz, CzICz and ICzICz

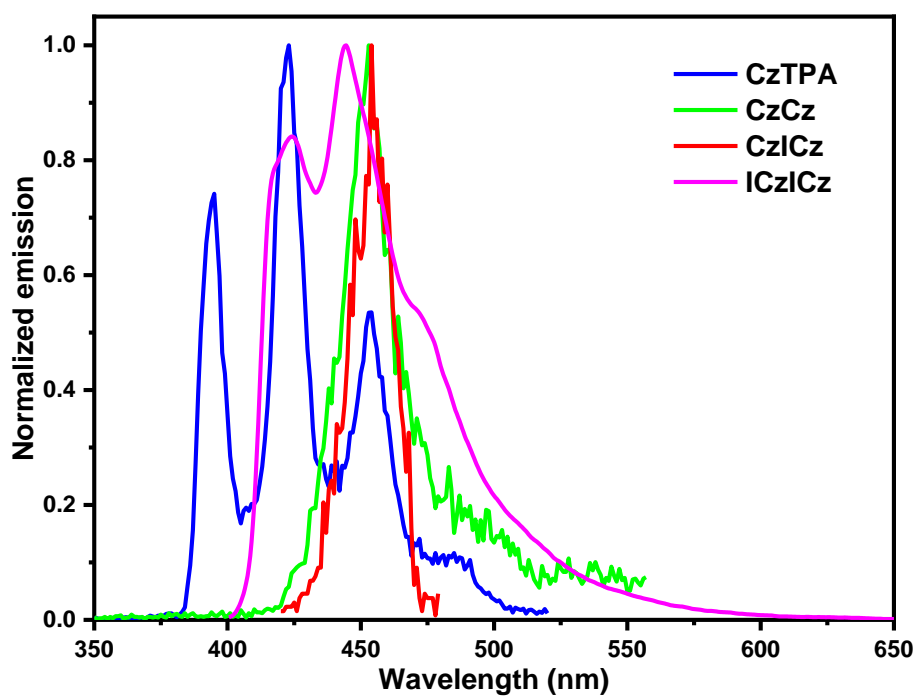

Figure S5. Phosphorescence spectra of CzTPA, CzCz, CzICz and ICzICz measured in frozen THF

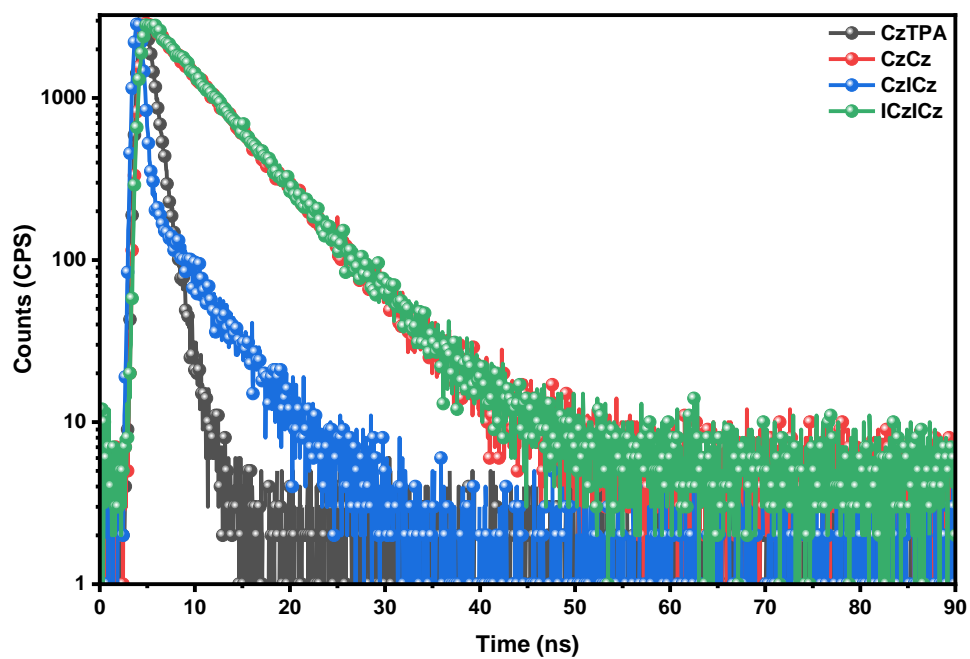

**Figure S6.** Time-resolved PL spectra of compounds collected in dilute DCM.

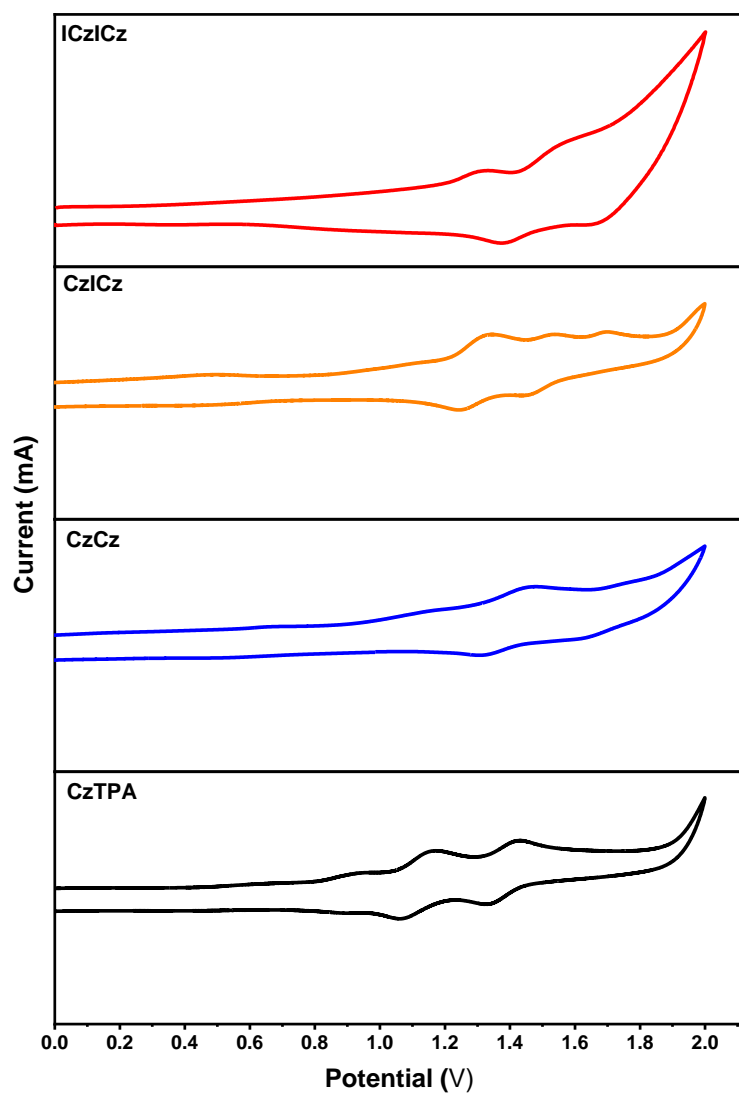

**Figure S7.** Cyclic Voltammograms of CzTPA, CzCz, CzICz and ICzICz

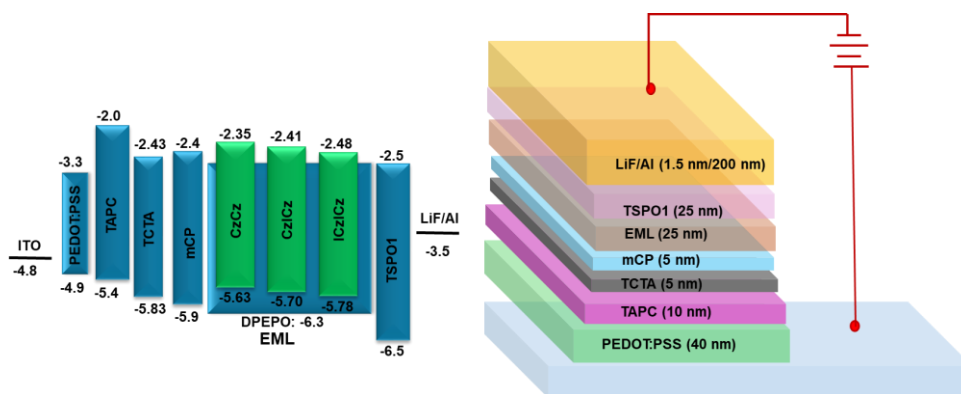

**Figure S8.** Fluorescent OLED device structure for **CzCz**, **CzICz** and **ICzICz** (all values in energy stack are in eV)

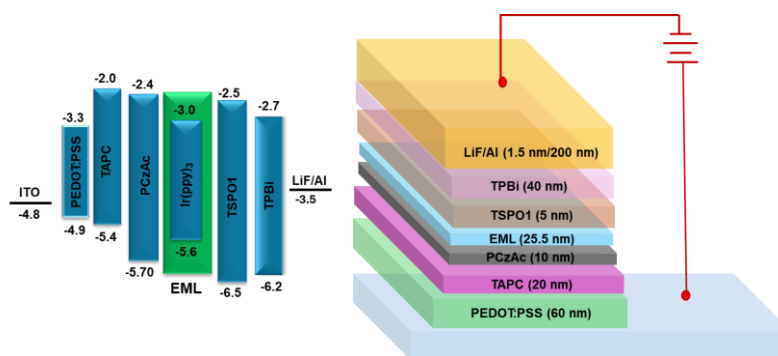

**Figure S9.** Phosphorescent OLED device structure for **CzCz**, **CzICz** and **ICzICz** (all values in energy stack are in eV)

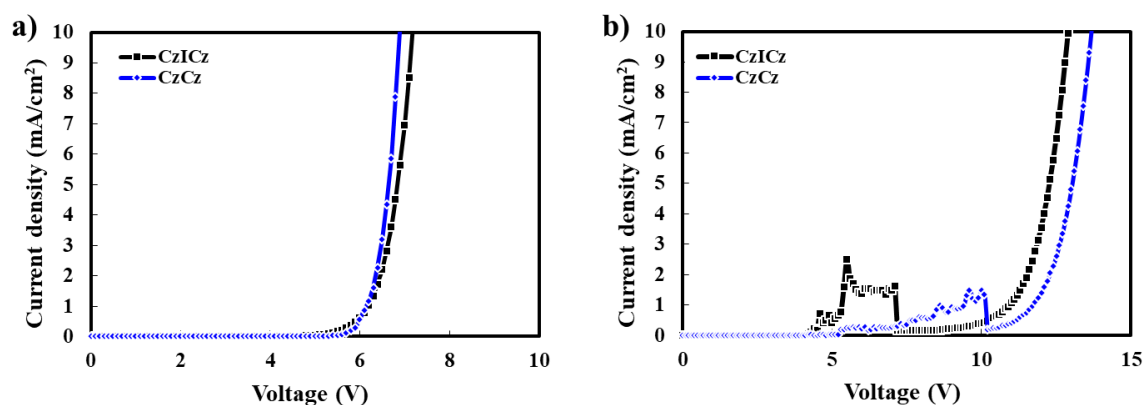

**Figure S10.** a) Hole only (HOD) and b) electron only (EOD) device studies of **CzICz** and **CzCz**.

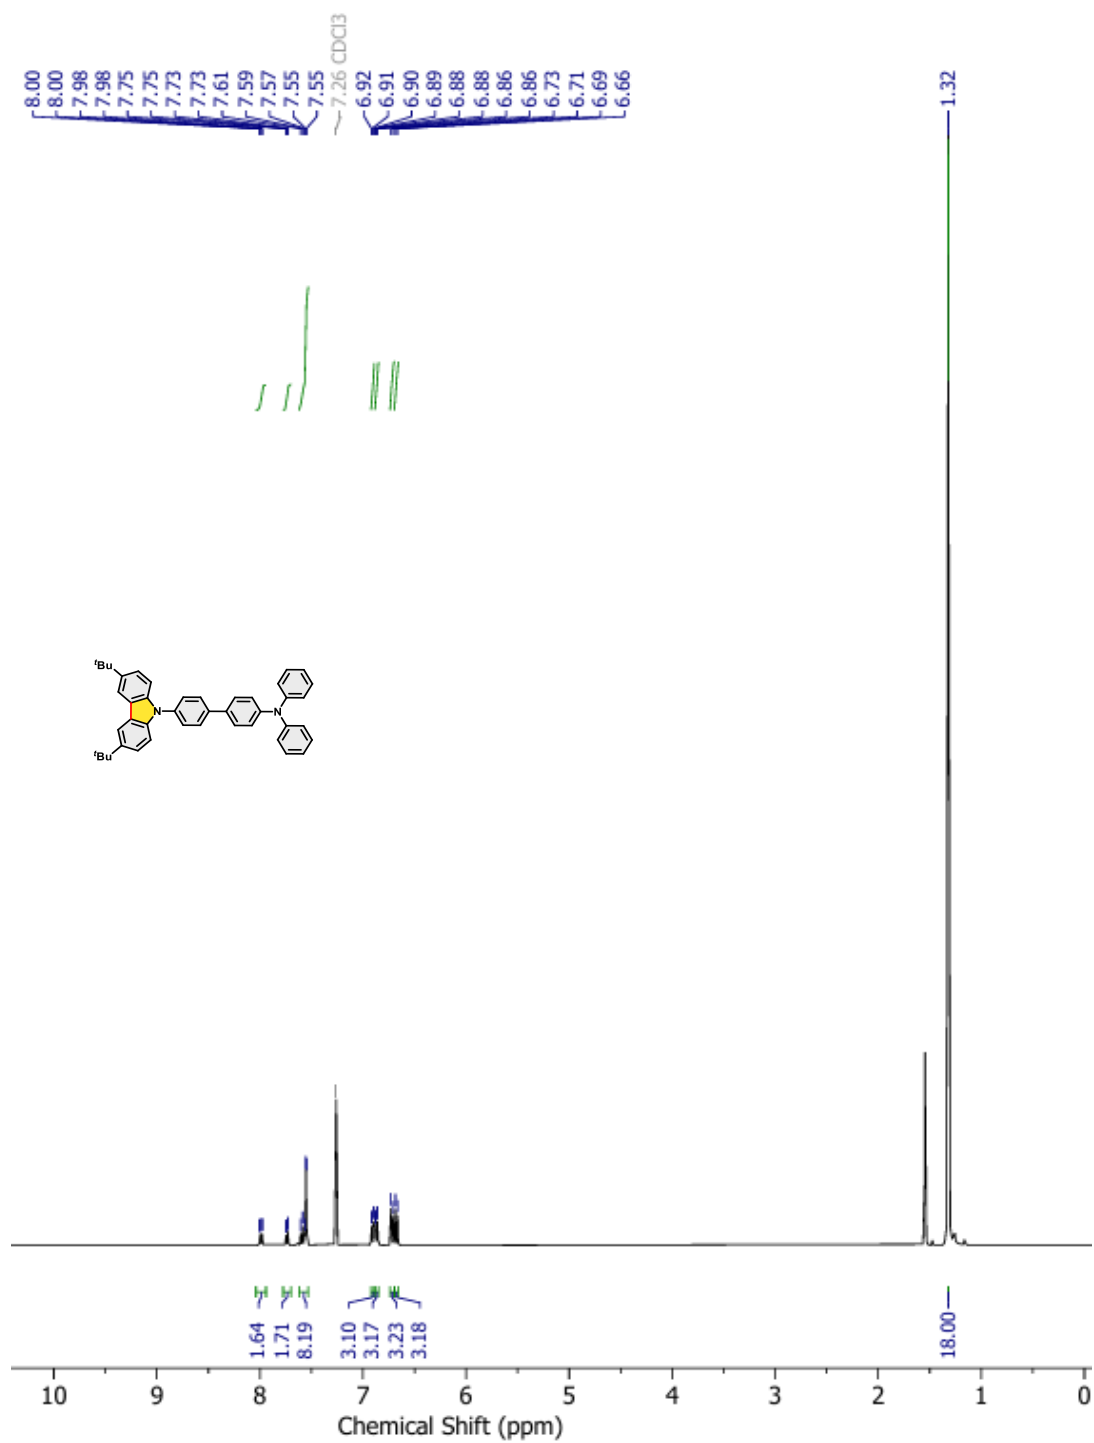

**Figure S11.**  $^1\text{H}$  NMR spectra of compound CzTPA recorded in  $\text{CDCl}_3$

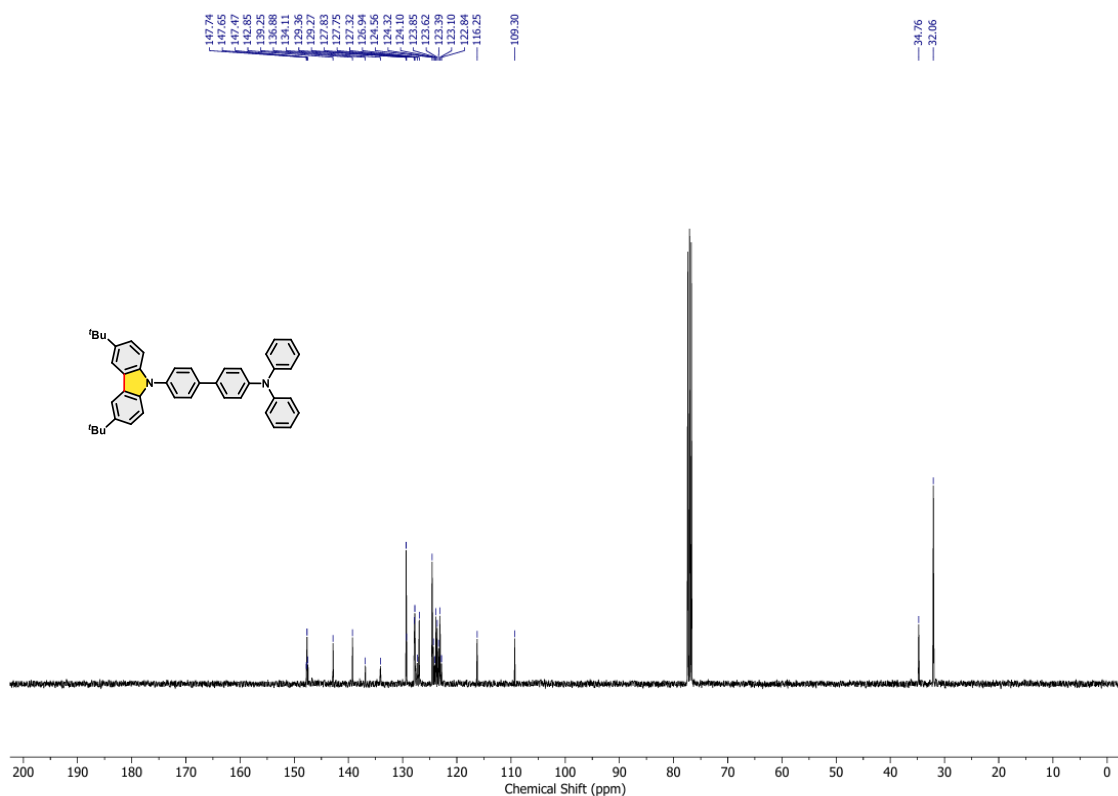

Figure S12.  $^{13}\text{C}$  NMR spectra of compound CzTPA recorded in  $\text{CDCl}_3$

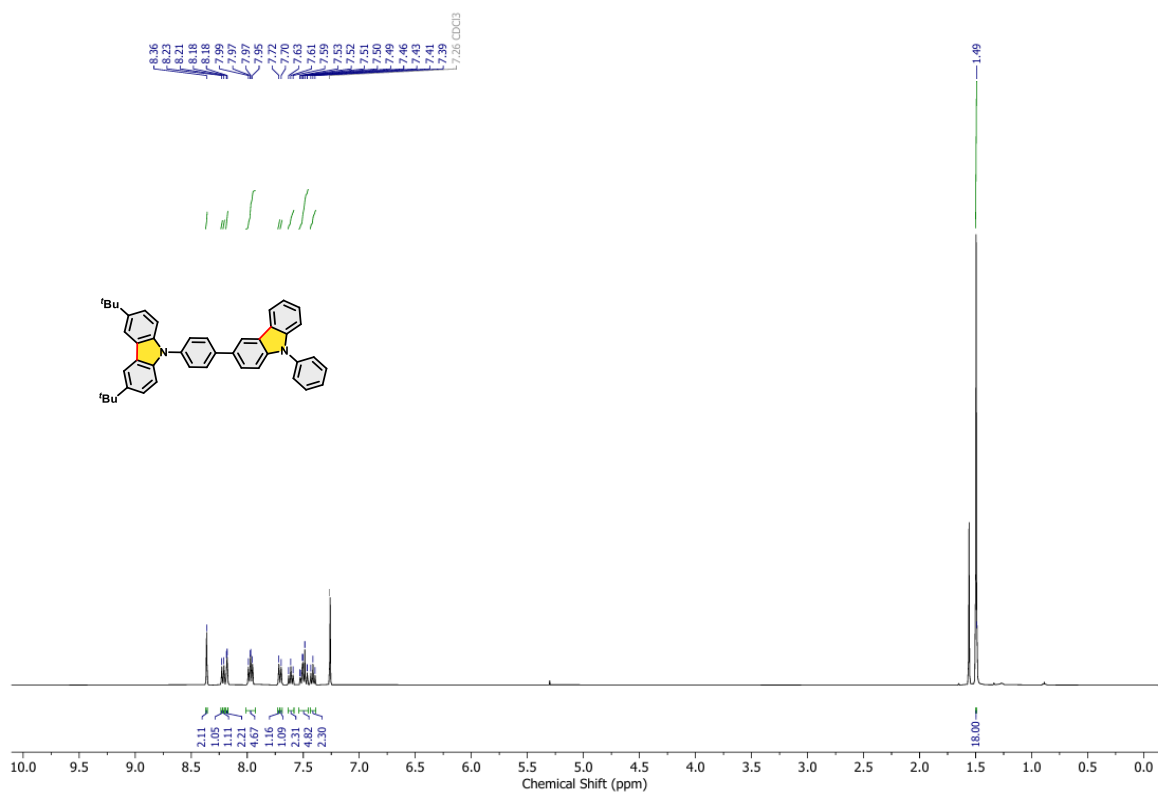

Figure S13.  $^1\text{H}$  NMR spectra of compound CzCz recorded in  $\text{CDCl}_3$

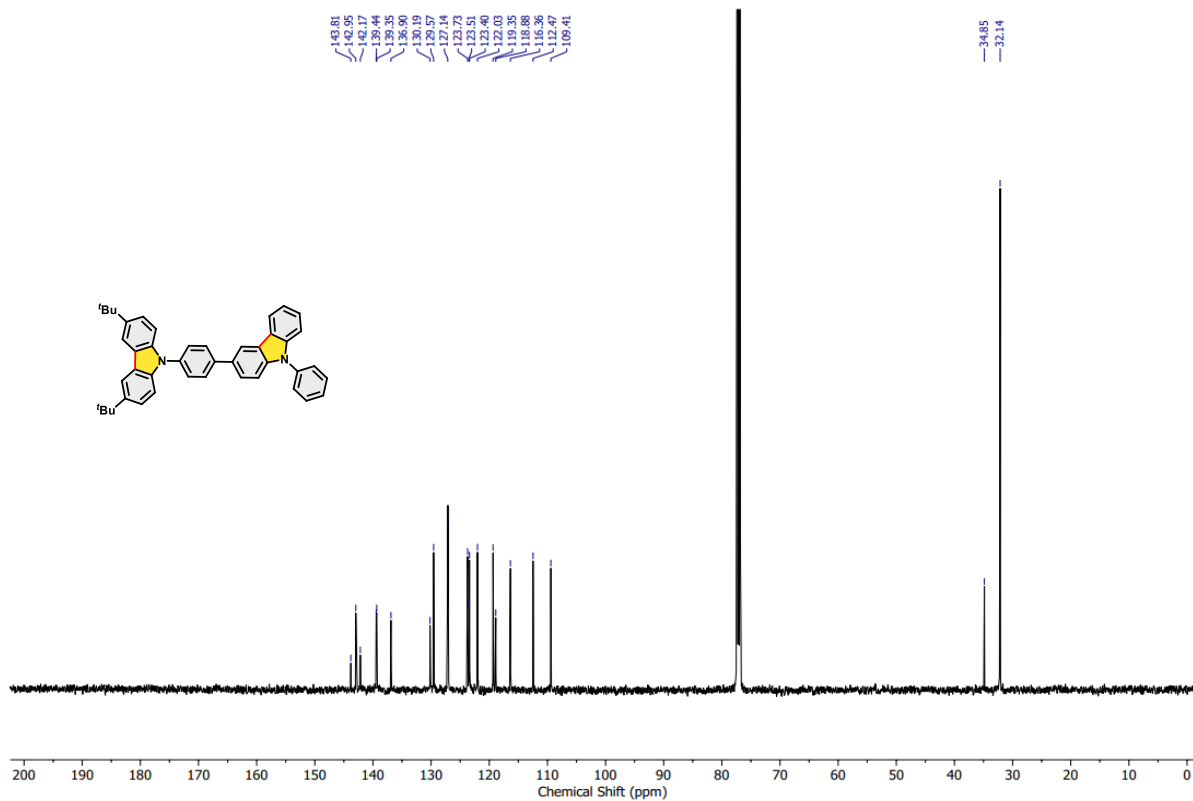

Figure S14.  $^{13}\text{C}$  NMR spectra of compound CzCz recorded in  $\text{CDCl}_3$

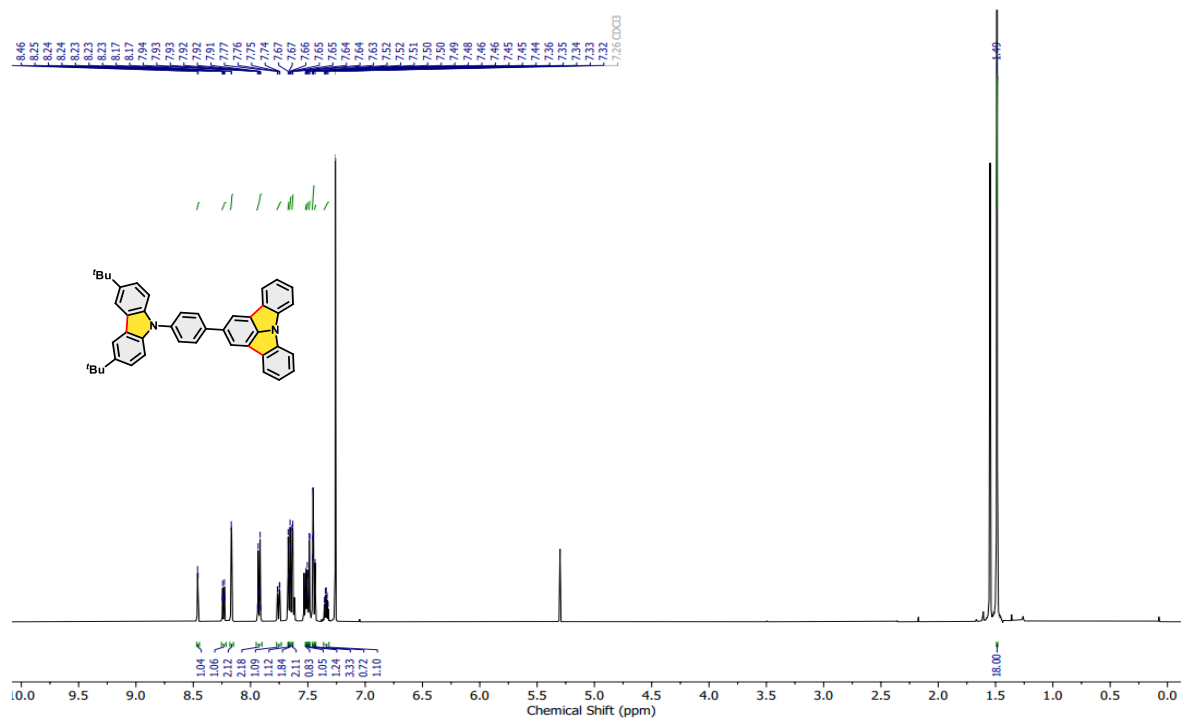

Figure S15.  $^1\text{H}$  NMR spectra of compound CzICz recorded in  $\text{CDCl}_3$



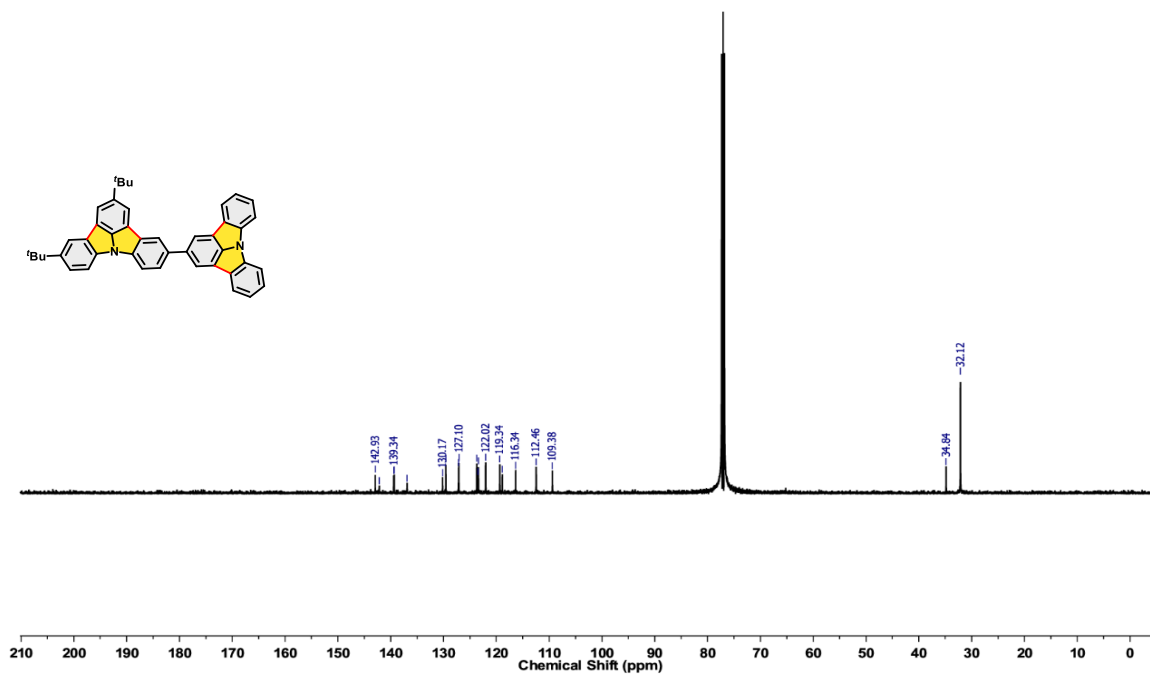

**Figure S18.** <sup>13</sup>C NMR spectra of compound ICzICz recorded in CDCl<sub>3</sub>

**Table S1.** Comparison of CIEy and EQE of ICzICz with the reported UV emitters.

| Sl. No. | Emitters                                                                                              | $\lambda_{PL}$ (nm) | EQE <sub>max</sub> (%) | CIEy  | Ref.                      |
|---------|-------------------------------------------------------------------------------------------------------|---------------------|------------------------|-------|---------------------------|
| 1.      | 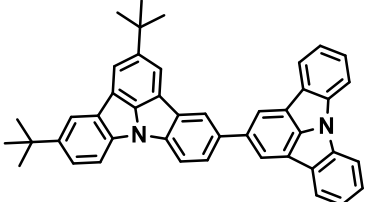<br><b>ICzICz</b>  | 398                 | 4.2                    | 0.029 | <a href="#">This work</a> |
| 2.      | <br><b>tIDCz</b>   | 399                 | 2.92                   | 0.051 | [2]                       |
| 3.      | <br><b>DPtIDCz</b> | 400                 | 2.59                   | 0.036 | [2]                       |

|     |                                                                                                                                      |     |      |       |     |
|-----|--------------------------------------------------------------------------------------------------------------------------------------|-----|------|-------|-----|
| 4.  | 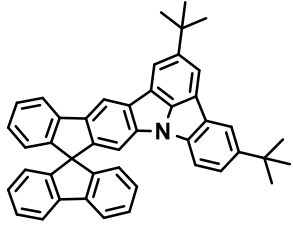 <p style="text-align: center;"><b>SFtIDCz</b></p>  | 399 | 2.41 | 0.033 | [2] |
| 5.  |  <p style="text-align: center;"><b>ICzICzCN</b></p> | 397 | 1.61 | 0.045 | [3] |
| 6.  |  <p style="text-align: center;"><b>ICzPICN</b></p>  | 400 | 0.80 | 0.041 | [3] |
| 7.  |  <p style="text-align: center;"><b>ICzPI</b></p>   | 403 | 3.07 | 0.046 | [3] |
| 8.  |  <p style="text-align: center;"><b>Pm-BN</b></p>  | 409 | 2.5  | 0.045 | [4] |
| 9.  |  <p style="text-align: center;"><b>M1</b></p>     | 399 | 1.94 | 0.05  | [5] |
| 10. |                                                   | 407 | 3.02 | 0.056 | [5] |

|     | <b>M2</b>                                                                                                 |     |      |       |     |
|-----|-----------------------------------------------------------------------------------------------------------|-----|------|-------|-----|
| 11. | 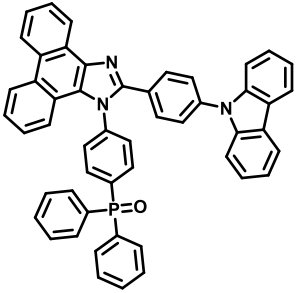 <p><b>PhImPOCz</b></p>  | 402 | 2.81 | 0.05  | [6] |
| 12. |  <p><b>PPI</b></p>       | 364 | 1.86 | 0.065 | [7] |
| 13. |  <p><b>mTPA-PPI</b></p> | 367 | 3.33 | 0.049 | [7] |
| 14. |  <p><b>DCzBN1</b></p>  | 403 | 2.5  | 0.05  | [8] |
| 15. |  <p><b>TPI-Bz</b></p>  | 383 | 1.45 | 0.04  | [9] |
| 16. |  <p><b>TPI-2Na</b></p> | 398 | 1.98 | 0.06  | [9] |

|     |                                                                                                                                |     |     |      |      |
|-----|--------------------------------------------------------------------------------------------------------------------------------|-----|-----|------|------|
| 17. | 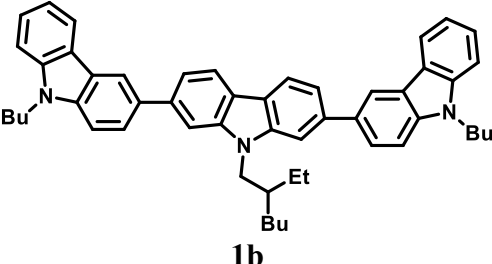 <p style="text-align: center;"><b>1b</b></p> | 397 | 2.7 | 0.05 | [10] |
| 18. |  <p style="text-align: center;"><b>2b</b></p> | 415 | 1.7 | 0.06 | [10] |

**Table S2.** Cartesian coordinates of the compound **CzTPA**

|   |             |             |             |
|---|-------------|-------------|-------------|
| C | -5.93626831 | -3.00549980 | 0.55024562  |
| C | -4.57304398 | -3.36596947 | 0.62427918  |
| C | -3.53569204 | -2.44605282 | 0.45162226  |
| C | -3.87235843 | -1.11768530 | 0.19196918  |
| C | -5.22972796 | -0.71502772 | 0.12335808  |
| C | -6.24391545 | -1.66031472 | 0.30048555  |
| H | -4.29930987 | -4.39505687 | 0.82452725  |
| H | -2.50150403 | -2.76521376 | 0.52505528  |
| H | -7.27946887 | -1.33687769 | 0.24531975  |
| C | -3.87235695 | 1.11768243  | -0.19198418 |
| C | -3.53569572 | 2.44605713  | -0.45161111 |

|   |             |             |             |
|---|-------------|-------------|-------------|
| C | -4.57305145 | 3.36597127  | -0.62425501 |
| C | -5.93627387 | 3.00549475  | -0.55022709 |
| C | -6.24391609 | 1.66031524  | -0.30043809 |
| C | -5.22972634 | 0.71502995  | -0.12330494 |
| H | -2.50151101 | 2.76523199  | -0.52499983 |
| H | -4.29932495 | 4.39506805  | -0.82446620 |
| H | -7.27947045 | 1.33689026  | -0.24521951 |
| N | -3.05074404 | -0.00000542 | -0.00000668 |
| C | -1.63054787 | -0.00000789 | 0.00000593  |
| C | -0.92083676 | -0.81772670 | -0.88894730 |
| C | -0.92085737 | 0.81771962  | 0.88897014  |
| C | 0.47266604  | -0.81948133 | -0.88126905 |
| H | -1.46464251 | -1.43454328 | -1.59742951 |
| C | 0.47264692  | 0.81950954  | 0.88129026  |
| H | -1.46467941 | 1.43449336  | 1.59747675  |
| C | 1.20201655  | 0.00002699  | 0.00000693  |
| H | 1.00211866  | -1.43982145 | -1.59811466 |
| H | 1.00208555  | 1.43986057  | 1.59813736  |
| C | 2.68488442  | 0.00005811  | 0.00000548  |
| C | 3.41740952  | 1.18032230  | 0.22241131  |

|   |             |             |             |
|---|-------------|-------------|-------------|
| C | 3.41744602  | -1.18017307 | -0.22240265 |
| C | 4.80936767  | 1.18717507  | 0.21625662  |
| H | 2.89119500  | 2.11991346  | 0.36360179  |
| C | 4.80941230  | -1.18697389 | -0.21625586 |
| H | 2.89126553  | -2.11978317 | -0.36359159 |
| C | 5.53017488  | 0.00011040  | -0.00000209 |
| H | 5.34499772  | 2.11819506  | 0.36964869  |
| H | 5.34507371  | -2.11797562 | -0.36965410 |
| N | 6.94822703  | 0.00012745  | -0.00005306 |
| C | 7.66278873  | -0.79155581 | -0.94275870 |
| C | 8.78490988  | -1.53571011 | -0.54206773 |
| C | 7.25900971  | -0.83795919 | -2.28762387 |
| C | 9.48962316  | -2.30220888 | -1.47085906 |
| H | 9.10113874  | -1.50815086 | 0.49563537  |
| C | 7.95925975  | -1.62040475 | -3.20635719 |
| H | 6.39746422  | -0.26040369 | -2.60664267 |
| C | 9.08039811  | -2.35416952 | -2.80675545 |
| H | 10.35505857 | -2.87151516 | -1.14360047 |
| H | 7.63352676  | -1.64400696 | -4.24248496 |
| H | 9.62714304  | -2.95666967 | -3.52561603 |

|   |             |            |             |
|---|-------------|------------|-------------|
| C | 7.66292086  | 0.79163275 | 0.94268707  |
| C | 8.78528215  | 1.53547179 | 0.54205511  |
| C | 7.25909110  | 0.83816473 | 2.28753332  |
| C | 9.49013699  | 2.30180069 | 1.47087155  |
| H | 9.10158203  | 1.50779904 | -0.49562160 |
| C | 7.95950079  | 1.62044183 | 3.20629337  |
| H | 6.39739924  | 0.26081674 | 2.60652762  |
| C | 9.08084664  | 2.35390628 | 2.80674762  |
| H | 10.35574555 | 2.87086667 | 1.14365437  |
| H | 7.63371541  | 1.64413474 | 4.24240336  |
| H | 9.62770614  | 2.95628500 | 3.52562271  |
| C | -7.07612902 | 4.02804780 | -0.73674085 |
| C | -7.94941044 | 4.07059450 | 0.54120600  |
| C | -6.55239716 | 5.45365241 | -1.00145395 |
| C | -7.95601134 | 3.61221699 | -1.94115428 |
| H | -8.39331760 | 3.09510836 | 0.76261536  |
| H | -7.35470332 | 4.37136739 | 1.41058573  |
| H | -8.76781295 | 4.79059073 | 0.42160386  |
| H | -5.95239430 | 5.50558402 | -1.91643740 |
| H | -7.39892735 | 6.13789939 | -1.12378394 |

|   |             |             |             |
|---|-------------|-------------|-------------|
| H | -5.94477748 | 5.82680329  | -0.16990354 |
| H | -8.77304731 | 4.32957836  | -2.08355924 |
| H | -7.36550266 | 3.57997937  | -2.86319213 |
| H | -8.40230927 | 2.62349412  | -1.79651901 |
| C | -7.07612282 | -4.02805453 | 0.73675647  |
| C | -7.95614771 | -3.61209599 | 1.94102120  |
| C | -7.94926259 | -4.07076777 | -0.54128123 |
| C | -6.55239742 | -5.45361923 | 1.00169707  |
| H | -7.36574995 | -3.57976237 | 2.86312685  |
| H | -8.40242374 | -2.62338555 | 1.79622733  |
| H | -8.77320416 | -4.32943818 | 2.08340581  |
| H | -7.35444947 | -4.37161530 | -1.41056232 |
| H | -8.76765261 | -4.79077966 | -0.42168810 |
| H | -8.39317933 | -3.09532167 | -0.76284424 |
| H | -7.39893000 | -6.13786420 | 1.12402348  |
| H | -5.94468985 | -5.82686282 | 0.17025137  |
| H | -5.95248526 | -5.50543093 | 1.91674540  |

**Table S3.** Cartesian Coordinates of the compound **CzCz**

|   |            |            |            |
|---|------------|------------|------------|
| C | 5.80958428 | 3.03246519 | 0.15997395 |
| C | 4.44088800 | 3.39889792 | 0.18486429 |

|   |            |             |             |
|---|------------|-------------|-------------|
| C | 3.40570092 | 2.46794452  | 0.17115498  |
| C | 3.74596226 | 1.11229265  | 0.13446991  |
| C | 5.10105747 | 0.70655090  | 0.09567599  |
| C | 6.12022286 | 1.67042564  | 0.11133070  |
| H | 4.17267090 | 4.45057260  | 0.21419510  |
| H | 2.37058986 | 2.79266279  | 0.18338711  |
| H | 7.15197133 | 1.33895699  | 0.08138683  |
| C | 3.74696900 | -1.15000252 | 0.03064904  |
| C | 3.40885648 | -2.50642516 | 0.00393551  |
| C | 4.44530608 | -3.43504130 | -0.03974375 |
| C | 5.81332043 | -3.06557167 | -0.05469318 |
| C | 6.12217955 | -1.70283534 | -0.01507470 |
| C | 5.10171536 | -0.74126059 | 0.03017263  |
| H | 2.37459972 | -2.83357630 | 0.02164798  |
| H | 4.17866860 | -4.48730327 | -0.06127070 |
| H | 7.15360332 | -1.36901098 | -0.01520009 |
| N | 2.92495491 | -0.01973627 | 0.09429518  |
| C | 1.50354327 | -0.02147559 | 0.11632972  |
| C | 0.81038148 | 0.56348160  | 1.18344704  |
| C | 0.77898140 | -0.60930478 | -0.92812014 |

|   |             |             |             |
|---|-------------|-------------|-------------|
| C | -0.58358853 | 0.56849992  | 1.19616813  |
| H | 1.36699580  | 1.01552662  | 1.99842355  |
| C | -0.61459809 | -0.62005191 | -0.89611258 |
| H | 1.31099909  | -1.06018399 | -1.75998143 |
| C | -1.32770889 | -0.02662822 | 0.16130621  |
| H | -1.10218710 | 1.05252102  | 2.01830783  |
| H | -1.15765531 | -1.10783662 | -1.70001604 |
| C | -2.81339095 | -0.02799435 | 0.18358892  |
| C | -3.54882076 | 0.17681873  | -0.99193291 |
| C | -3.51237265 | -0.24224501 | 1.39628441  |
| C | -4.94663948 | 0.17412620  | -0.95370465 |
| H | -3.03224550 | 0.36052722  | -1.92952548 |
| C | -4.90310065 | -0.24988896 | 1.46268714  |
| H | -2.94665690 | -0.43512473 | 2.30268954  |
| C | -5.61615587 | -0.03208765 | 0.27977318  |
| H | -5.41068354 | -0.43442928 | 2.40338974  |
| N | -6.99540885 | -0.00266150 | 0.06192011  |
| C | -7.22229963 | 0.22412127  | -1.30030949 |
| C | -8.43342934 | 0.35988576  | -1.98671300 |
| C | -5.97280599 | 0.34168014  | -1.96330571 |

|   |              |             |             |
|---|--------------|-------------|-------------|
| C | -8.37640843  | 0.60288519  | -3.35904719 |
| H | -9.38539217  | 0.28444902  | -1.47229556 |
| C | -5.94367309  | 0.58558534  | -3.34264064 |
| C | -7.14654023  | 0.71207959  | -4.03475765 |
| H | -9.30281036  | 0.71219752  | -3.91527887 |
| H | -4.99591035  | 0.67870116  | -3.86535969 |
| H | -7.13754104  | 0.90067321  | -5.10387763 |
| C | -7.99933239  | -0.17351296 | 1.05734093  |
| C | -8.90679585  | -1.23636186 | 0.96225922  |
| C | -8.07960180  | 0.72071321  | 2.13253469  |
| C | -9.89479634  | -1.39625659 | 1.93608559  |
| H | -8.82812228  | -1.93233292 | 0.13307406  |
| C | -9.05914620  | 0.54439623  | 3.11207396  |
| H | -7.38154303  | 1.54990317  | 2.19003960  |
| C | -9.97119065  | -0.51043486 | 3.01475916  |
| H | -10.59707366 | -2.22087205 | 1.85704672  |
| H | -9.11611557  | 1.23935059  | 3.94467734  |
| H | -10.73616319 | -0.64125024 | 3.77416649  |
| C | 6.89310523   | -4.16431359 | -0.10927221 |
| C | 6.76027545   | -5.08798789 | 1.12655998  |

|   |            |             |             |
|---|------------|-------------|-------------|
| C | 6.71372616 | -5.00654798 | -1.39635973 |
| C | 8.32072856 | -3.58326226 | -0.11688239 |
| H | 6.89090925 | -4.51976156 | 2.05389050  |
| H | 5.78080974 | -5.57427578 | 1.16865206  |
| H | 7.52256475 | -5.87573604 | 1.09822144  |
| H | 6.81169195 | -4.37972262 | -2.28935866 |
| H | 7.47496679 | -5.79423682 | -1.44673500 |
| H | 5.73229498 | -5.48931589 | -1.43369349 |
| H | 9.04936076 | -4.40007556 | -0.15796877 |
| H | 8.49542605 | -2.94144364 | -0.98722480 |
| H | 8.52912221 | -3.00099701 | 0.78726926  |
| C | 6.88807985 | 4.13357640  | 0.18276073  |
| C | 6.74427567 | 4.97610203  | 1.47413456  |
| C | 8.31660150 | 3.55565118  | 0.14928121  |
| C | 6.71745326 | 5.05630685  | -1.04913580 |
| H | 5.76333504 | 5.45686912  | 1.53965386  |
| H | 6.86938735 | 4.34990836  | 2.36418771  |
| H | 7.50501638 | 5.76538226  | 1.50208804  |
| H | 8.49999365 | 2.97332533  | -0.76022632 |
| H | 9.04432907 | 4.37406781  | 0.16881633  |

|   |            |            |             |
|---|------------|------------|-------------|
| H | 8.51785634 | 2.91469988 | 1.01451770  |
| H | 7.47842136 | 5.84582155 | -1.04325826 |
| H | 6.82253458 | 4.48788427 | -1.97958658 |
| H | 5.73604706 | 5.54029672 | -1.06315464 |

**Table S4.** Cartesian coordinates of the compound **CzICz**

|   |             |             |             |
|---|-------------|-------------|-------------|
| C | -5.57885771 | -3.02885824 | 0.36347487  |
| C | -4.21053427 | -3.39552947 | 0.39931025  |
| C | -3.17423602 | -2.47182658 | 0.29239606  |
| C | -3.51286809 | -1.12311375 | 0.14701161  |
| C | -4.86773872 | -0.71860009 | 0.09356982  |
| C | -5.88808217 | -1.67489670 | 0.20484340  |
| H | -3.94333399 | -4.44168190 | 0.51320130  |
| H | -2.13975830 | -2.79776248 | 0.31665441  |
| H | -6.91961225 | -1.34422243 | 0.16175073  |
| C | -3.51276892 | 1.12285426  | -0.14787509 |
| C | -3.17393244 | 2.47152644  | -0.29315479 |
| C | -4.21010662 | 3.39541629  | -0.39958500 |
| C | -5.57848316 | 3.02894153  | -0.36338149 |
| C | -5.88789325 | 1.67502155  | -0.20482091 |
| C | -4.86767192 | 0.71854034  | -0.09397013 |

|   |             |             |             |
|---|-------------|-------------|-------------|
| H | -2.13939151 | 2.79725645  | -0.31764022 |
| H | -3.94280519 | 4.44155541  | -0.51336675 |
| H | -6.91947794 | 1.34454911  | -0.16143805 |
| N | -2.69099537 | -0.00020337 | -0.00068104 |
| C | -1.26989645 | -0.00018462 | -0.00050984 |
| C | -0.56096264 | -0.50658308 | 1.09609206  |
| C | -0.56085706 | 0.50629431  | -1.09701934 |
| C | 0.83315026  | -0.51499636 | 1.08712188  |
| H | -1.10512067 | -0.89550621 | 1.95098785  |
| C | 0.83324663  | 0.51486071  | -1.08786917 |
| H | -1.10497503 | 0.89514982  | -1.95197909 |
| C | 1.56122049  | -0.00003192 | -0.00032088 |
| H | 1.36488537  | -0.93879006 | 1.93385905  |
| H | 1.36505878  | 0.93870275  | -1.93453404 |
| C | 3.05080278  | 0.00004894  | -0.00021483 |
| C | 3.73615083  | -0.38144058 | -1.18696254 |
| C | 3.73593733  | 0.38156031  | 1.18664899  |
| C | 5.13719447  | -0.38397815 | -1.20005008 |
| H | 3.15602525  | -0.68703487 | -2.05202606 |
| C | 5.13697944  | 0.38425098  | 1.19994033  |

|   |            |             |             |
|---|------------|-------------|-------------|
| H | 3.15565138 | 0.68700288  | 2.05165832  |
| C | 5.71272537 | 0.00024525  | -0.00003778 |
| N | 7.07767194 | 0.00024173  | 0.00008565  |
| C | 7.48450399 | -0.41348160 | -1.27995028 |
| C | 8.75976634 | -0.58504467 | -1.81109870 |
| C | 6.29768473 | -0.66480472 | -2.05809856 |
| C | 8.86104382 | -1.01500685 | -3.13833597 |
| H | 9.64836247 | -0.39354002 | -1.21934300 |
| C | 6.43848853 | -1.09254793 | -3.37996240 |
| C | 7.71894666 | -1.26579946 | -3.91340405 |
| H | 9.84546147 | -1.15640125 | -3.57420803 |
| H | 5.56016870 | -1.28928469 | -3.98782868 |
| H | 7.83192182 | -1.59885823 | -4.94044060 |
| C | 7.48427422 | 0.41357802  | 1.28031934  |
| C | 8.75944137 | 0.58490940  | 1.81177096  |
| C | 6.29731520 | 0.66487617  | 2.05826293  |
| C | 8.86048131 | 1.01458696  | 3.13911847  |
| H | 9.64814339 | 0.39343186  | 1.22016542  |
| C | 6.43788262 | 1.09236410  | 3.38023451  |
| C | 7.71824513 | 1.26536300  | 3.91398724  |

|   |             |             |             |
|---|-------------|-------------|-------------|
| H | 9.84482074  | 1.15577012  | 3.57523532  |
| H | 5.55945426  | 1.28908865  | 3.98794784  |
| H | 7.83103608  | 1.59821133  | 4.94111234  |
| C | -6.65787282 | 4.12171716  | -0.49393114 |
| C | -6.50519794 | 5.14555724  | 0.65779421  |
| C | -6.49701458 | 4.85225572  | -1.84983250 |
| C | -8.08599273 | 3.54530717  | -0.43119964 |
| H | -6.62206086 | 4.65746969  | 1.63144729  |
| H | -5.52483342 | 5.63163769  | 0.64392962  |
| H | -7.26716687 | 5.92975853  | 0.57504969  |
| H | -6.60980046 | 4.15293359  | -2.68541433 |
| H | -7.25767200 | 5.63511042  | -1.95460149 |
| H | -5.51550493 | 5.32733040  | -1.94249898 |
| H | -8.81433922 | 4.35744665  | -0.52963109 |
| H | -8.27460737 | 2.83323393  | -1.24195767 |
| H | -8.28118351 | 3.04137288  | 0.52163605  |
| C | -6.65841380 | -4.12142426 | 0.49441457  |
| C | -6.49718736 | -4.85207912 | 1.85020277  |
| C | -8.08646422 | -3.54476093 | 0.43224602  |
| C | -6.50635287 | -5.14525549 | -0.65739879 |

|   |             |             |             |
|---|-------------|-------------|-------------|
| H | -5.51576412 | -5.32742284 | 1.94243050  |
| H | -6.60946056 | -4.15279909 | 2.68588536  |
| H | -7.25798935 | -5.63476058 | 1.95522447  |
| H | -8.28196881 | -3.04086406 | -0.52054056 |
| H | -8.81490359 | -4.35677363 | 0.53103902  |
| H | -8.27460695 | -2.83260170 | 1.24303577  |
| H | -7.26842922 | -5.92932857 | -0.57440567 |
| H | -6.62346953 | -4.65712907 | -1.63100129 |
| H | -5.52606487 | -5.63150677 | -0.64388534 |

**Table S5.** Cartesian coordinates of the compound **ICzICz**

|   |            |             |             |
|---|------------|-------------|-------------|
| C | 5.17594437 | -0.40975349 | 0.07727529  |
| C | 6.51812129 | -0.77170488 | 0.15625467  |
| C | 6.89840452 | -2.09136987 | 0.45681888  |
| C | 5.88270636 | -3.03948540 | 0.67596119  |
| C | 4.52240913 | -2.72085735 | 0.60672459  |
| C | 4.17005247 | -1.41275667 | 0.30906262  |
| N | 2.91210745 | -0.80059759 | 0.17353449  |
| C | 3.14771200 | 0.51156526  | -0.12636134 |
| C | 1.51815745 | -0.95963974 | 0.21484363  |
| C | 0.73726703 | -2.08163949 | 0.46818581  |

|   |             |             |             |
|---|-------------|-------------|-------------|
| C | -0.64986498 | -1.93634665 | 0.44059187  |
| C | -1.27464092 | -0.70291734 | 0.16223543  |
| C | -0.47065109 | 0.42086166  | -0.09418404 |
| C | 0.91827639  | 0.31768217  | -0.07111439 |
| C | 2.00882604  | 1.27847797  | -0.29723215 |
| C | 2.26836291  | 2.61894593  | -0.60393150 |
| C | 3.60919305  | 3.08054668  | -0.71369465 |
| C | 4.70794014  | 2.20612954  | -0.51773723 |
| C | 4.48273248  | 0.85576932  | -0.20905956 |
| C | 3.82990091  | 4.57274852  | -1.05540409 |
| C | 5.32166296  | 4.94943155  | -1.14431379 |
| C | 3.18549518  | 5.45776095  | 0.03865203  |
| C | 3.18070438  | 4.89454295  | -2.42305272 |
| C | 8.39586913  | -2.44912046 | 0.53515082  |
| C | 9.06869737  | -2.15944791 | -0.82784106 |
| C | 8.62963890  | -3.93342159 | 0.87538433  |
| C | 9.07491303  | -1.59481510 | 1.63214211  |
| C | -2.76000419 | -0.59434111 | 0.14204881  |
| C | -3.51600480 | -1.62328663 | -0.48271366 |
| C | -4.91304434 | -1.53456042 | -0.50587340 |

|   |             |             |             |
|---|-------------|-------------|-------------|
| C | -5.41445472 | -0.39798619 | 0.10554810  |
| C | -4.76828013 | 0.65351430  | 0.73309632  |
| C | -3.37330205 | 0.53558937  | 0.74843204  |
| N | -6.77598354 | -0.29771906 | 0.08762019  |
| C | -7.10356114 | 0.89893308  | 0.74776718  |
| C | -7.25792670 | -1.43538210 | -0.58204774 |
| C | -6.12128810 | -2.23074799 | -0.96980258 |
| C | -6.34129867 | -3.42460709 | -1.65780334 |
| C | -7.64850586 | -3.81723170 | -1.95198690 |
| C | -8.74003353 | -3.02839738 | -1.56483900 |
| C | -8.56001425 | -1.82703903 | -0.87456150 |
| C | -8.34146971 | 1.47734738  | 1.00742233  |
| C | -8.36159332 | 2.69280154  | 1.69621444  |
| C | -7.17684129 | 3.31358446  | 2.11402174  |
| C | -5.93398390 | 2.73335800  | 1.85301680  |
| C | -5.87329220 | 1.51956491  | 1.16741322  |
| H | 7.27648372  | -0.01355866 | -0.01880962 |
| H | 6.14561363  | -4.06459473 | 0.90966264  |
| H | 3.77019360  | -3.48344459 | 0.78318508  |
| H | 1.18729359  | -3.04332591 | 0.69365623  |

|   |             |             |             |
|---|-------------|-------------|-------------|
| H | -1.27017717 | -2.79869638 | 0.66656915  |
| H | -0.93848293 | 1.37113056  | -0.33610375 |
| H | 1.45300236  | 3.31836392  | -0.76125344 |
| H | 5.71841646  | 2.58612468  | -0.60791608 |
| H | 5.41686359  | 6.01380675  | -1.38710399 |
| H | 5.84409526  | 4.78058917  | -0.19579568 |
| H | 5.84054380  | 4.38589679  | -1.92807920 |
| H | 3.33256536  | 6.52011073  | -0.19257667 |
| H | 2.10801945  | 5.28339074  | 0.12520241  |
| H | 3.63487700  | 5.25744622  | 1.01803066  |
| H | 3.32808695  | 5.95152973  | -2.67753968 |
| H | 3.62644317  | 4.28763098  | -3.21940562 |
| H | 2.10304696  | 4.70100808  | -2.42125611 |
| H | 10.13759668 | -2.40300985 | -0.78663291 |
| H | 8.61349206  | -2.75900602 | -1.62438924 |
| H | 8.97870861  | -1.10558686 | -1.11152633 |
| H | 9.70568856  | -4.13610610 | 0.91940024  |
| H | 8.20396787  | -4.20145052 | 1.84913255  |
| H | 8.19988104  | -4.59899233 | 0.11805563  |
| H | 10.14389283 | -1.83305476 | 1.69598993  |

|   |             |             |             |
|---|-------------|-------------|-------------|
| H | 8.98502508  | -0.52261157 | 1.42843486  |
| H | 8.62430162  | -1.78667535 | 2.61260457  |
| H | -2.98756395 | -2.44767221 | -0.95202267 |
| H | -2.74220379 | 1.27351855  | 1.23454754  |
| H | -5.50086952 | -4.04262642 | -1.96212456 |
| H | -7.82214447 | -4.74586257 | -2.48796426 |
| H | -9.74843571 | -3.35389766 | -1.80462195 |
| H | -9.41073511 | -1.22167182 | -0.57836074 |
| H | -9.26363336 | 1.00287595  | 0.68738878  |
| H | -9.31737866 | 3.16278226  | 1.91049565  |
| H | -7.22658199 | 4.25820227  | 2.64787328  |
| H | -5.02034954 | 3.22185402  | 2.18091271  |

## References

1. P. Keerthika, S. W. Han, A. Kumar, V. Nutalapati, K. R. Naveen, J. Y. Lee and R. K. Konidena, *Chem. Commun.* **2025**, *61*, 12554–12557.
2. F. Zhong, B. Zhang, Y. Huang, B. Li, X. He, Z. Wang and B. Z. Tang, *Adv. Optical Mater.*, 2025, **13**, 2403538.
3. R. K. Konidena, S. Oh, S. Kang, S.-S. Park, H. Lee and J. Park, *J. Org. Chem.*, 2022, **87**, 10, 6668–6679.
4. X. Cai, Y. Pan, C. Li, L. Li, Y. Pu, Y. Wu and Y. Wang, *Angew. Chem. Int. Ed.*, 2024, **63**, e202408522.

5. Z. Gao, Y. Liu, Z. Wang, F. Shen, H. Liu, G. Sun, L. Yao, Y. Lv, P. Lu and Y. Ma, *Chem. Eur. J.*, 2013, **19**, 2602 – 2605.
6. S. Chen, C. Zhang and H. Xu, *Chem. Engin. J.*, 2022, **429**, 132327.
7. H. Liu, Q. Bai, L. Yao, H. Zhang, H. Xu, S. Zhang, W. Li, Y. Gao, J. Li, P. Lu, H. Wang, B. Yang and Y. Ma, *Chem. Sci.*, 2015, **6**, 3797-3804.
8. C. Y. Chan, L. S. Cui, J. U. Kim, H. Nakanotani and C. Adachi, *Adv. Funct. Mater.* 2018, **11**, 1706023.
9. W. C. Chen, Y. Yuan, Y. Xiong, A. L. Rogach, Q. X. Tong and C. S. Lee, *ACS Appl. Mater. Interfaces*, 2017, **9**, 26268-26278.
10. R. K. Konidena, K. R. J. Thomas, S. Sahoo, D. K. Dubey and J. H. Jou, *J. Mater. Chem. C*, 2017, **5**, 709-726.
